# Supplementary material
Source: publisher figshare collection journal article supplement (https://sage.figshare.com/ndownloader/files/24953721)
Supplement: Supplementary file 1 [file 24953721]

## Sheet: Chemistry SINM
	Efu	Elr	Esp	Enk	Els	Ich	Vpr	Vpa	Vpm	Vpu	Vpo	Btv	Bsb	Bwc	Bsr	Bsm	Bsc	Sce	Scg	Scl	Sct	Scu	Sci	Fmc	Fms	Fmd	Fmw	Ksc	Kex	Kis	Kue
Efu	0	1.11445	1.11533	1.01022	1.10666	0.269076	0	0	0.0697076	0	0.0637224	0.147219	0	0.17157	0	0	0	0	0.0795744	0.217126	0.18366	0.0163785	0	0.044612	0.110334	0	0	0	0	0	0
Elr	1.11445	0	0.393159	1.0329	1.05069	0.169376	0.0785316	0	0.224235	0.264387	0	0.462525	0.463538	0.0971638	0	0.609626	0	0.0961947	0.0964689	0	0.205295	0	0	0.117565	0.0331875	0.390267	0.156769	0.147185	0	0	0
Esp	1.11533	0.393159	0	1.10175	0.368023	0.554691	0.0572266	0.153424	0.0318273	0.0370701	0.194444	0.160283	0.0612454	0.0713075	0.180484	0	0	0	0.484373	0.292805	0.178521	0.260359	0.0487556	0.0421239	0	0.383001	0.212459	0.0845223	0	0	0
Enk	1.01022	1.0329	1.10175	0	1.76004	0.190884	0	0	0.136759	0.448126	0	0.304018	0	0	0	0	0	0	0.141675	0.0359985	0	0.0954207	0.259364	0	0	0	0	0	0	0	0
Els	1.10666	1.05069	0.368023	1.76004	0	0.607451	0	0.21759	0.395608	0.0934539	0.0878488	0	0	0.244198	0	0	0	0	0.0353769	0	0	0.251739	0	0.578771	0.7327	0	0	0	0	0	0
Ich	0.269076	0.169376	0.554691	0.190884	0.607451	0	0	0.0901525	0	0	0.0856636	0	0.125351	0	0	0.118698	0	0.57542	0	0.324278	0	0.0781916	0	0.0947877	0.485603	0.538397	0	0	0	0	0
Vpr	0	0.0785316	0.0572266	0	0	0	0	0.325956	0.617613	0.590078	0	0.244814	0.128984	0.147415	0.126713	0.111551	0	0	0	0	0	0	0	0	0	0	0	0	0	0	0
Vpa	0	0	0.153424	0	0.21759	0.0901525	0.325956	0	1.81191	0.276371	1.4232	0	0	0	0.0946582	0	0	0	0	0	0	0	0	0.699569	0.0941949	0	0.247031	0	0	0	0
Vpm	0.0697076	0.224235	0.0318273	0.136759	0.395608	0	0.617613	1.81191	0	1.00577	1.04579	0.242029	0.110662	0	0	0.0805439	0	0.334144	0	0	0	0.321369	0	0.203776	0.39084	0.376671	0	0.0663252	0.143623	0	0
Vpu	0	0.264387	0.0370701	0.448126	0.0934539	0	0.590078	0.276371	1.00577	0	0.513544	0.280687	0	0.0598557	0	0	0	0	0.270252	0.197441	0	0	0.306572	0	0	0	0.237393	0	0	0	0
Vpo	0.0637224	0	0.194444	0	0.0878488	0.0856636	0	1.4232	1.04579	0.513544	0	0	0	0.0841433	0	0	0	0	0.0335747	0	0.0824689	0	0	0.762919	0.611831	0	0.405481	0	0	0	0
Btv	0.147219	0.462525	0.160283	0.304018	0	0	0.244814	0	0.242029	0.280687	0	0	0.786965	0.474191	0.575375	0.649283	0	0	0	0	0	0	0.0674095	0.294678	0	0	0.15781	0	0.321771	-0.102041	0
Bsb	0	0.463538	0.0612454	0	0	0.125351	0.128984	0	0.110662	0	0	0.786965	0	1.37132	0.912548	0.8743	1.08689	0.205919	0	0	0	0.0705799	0	0.0422872	0.164239	0	0.274258	0	0	0	0
Bwc	0.17157	0.0971638	0.0713075	0	0.244198	0	0.147415	0	0	0.0598557	0.0841433	0.474191	1.37132	0	0.862843	0.571246	0	0	0	0	0	0	0	0	0.0433302	0	0.360578	0	0	0	0
Bsr	0	0	0.180484	0	0	0	0.126713	0.0946582	0	0	0	0.575375	0.912548	0.862843	0	1.2809	0.781101	0	0	0	0	0	0	0	0	0	0	0	0	0	0
Bsm	0	0.609626	0	0	0	0.118698	0.111551	0	0.0805439	0	0	0.649283	0.8743	0.571246	1.2809	0	0.397424	0.0415301	0.166032	0	0	0	0	0.068158	0	0	0.0895403	0	0	0	0
Bsc	0	0	0	0	0	0	0	0	0	0	0	0	1.08689	0	0.781101	0.397424	0	0	0	0	0	0	0.241061	0	0	0.354729	0	0	0	0	0
Sce	0	0.0961947	0	0	0	0.57542	0	0	0.334144	0	0	0	0.205919	0	0	0.0415301	0	0	0.957796	0.472631	1.46118	0.342333	0.399421	0.264819	0.0866683	0.772568	0.138176	0.0757058	0.159628	0	0
Scg	0.0795744	0.0964689	0.484373	0.141675	0.0353769	0	0	0	0	0.270252	0.0335747	0	0	0	0	0.166032	0	0.957796	0	0.606204	0.418864	0.588717	0.432001	0.123341	0	0	0.136434	0.381296	0.250969	0	0
Scl	0.217126	0	0.292805	0.0359985	0	0.324278	0	0	0	0.197441	0	0	0	0	0	0	0	0.472631	0.606204	0	1.91425	0.781455	1.04617	0	0	0.278865	0	0	0.139132	0	0
Sct	0.18366	0.205295	0.178521	0	0	0	0	0	0	0	0.0824689	0	0	0	0	0	0	1.46118	0.418864	1.91425	0	0.904252	1.0551	0	0.139673	0.120044	0.0737121	0.225434	0.0590264	0	0
Scu	0.0163785	0	0.260359	0.0954207	0.251739	0.0781916	0	0	0.321369	0	0	0	0.0705799	0	0	0	0	0.342333	0.588717	0.781455	0.904252	0	1.56987	0	0.0510972	0	0.22362	0	0.19243	0	0
Sci	0	0	0.0487556	0.259364	0	0	0	0	0	0.306572	0	0.0674095	0	0	0	0	0.241061	0.399421	0.432001	1.04617	1.0551	1.56987	0	0	0	0	0	0	0	0	0
Fmc	0.044612	0.117565	0.0421239	0	0.578771	0.0947877	0	0.699569	0.203776	0	0.762919	0.294678	0.0422872	0	0	0.068158	0	0.264819	0.123341	0	0	0	0	0	2.69232	1.67525	0.783585	0	0	0	0
Fms	0.110334	0.0331875	0	0	0.7327	0.485603	0	0.0941949	0.39084	0	0.611831	0	0.164239	0.0433302	0	0	0	0.0866683	0	0	0.139673	0.0510972	0	2.69232	0	1.92433	0.886234	0	0	0	0
Fmd	0	0.390267	0.383001	0	0	0.538397	0	0	0.376671	0	0	0	0	0	0	0	0.354729	0.772568	0	0.278865	0.120044	0	0	1.67525	1.92433	0	2.18701	0	0	0	0
Fmw	0	0.156769	0.212459	0	0	0	0	0.247031	0	0.237393	0.405481	0.15781	0.274258	0.360578	0	0.0895403	0	0.138176	0.136434	0	0.0737121	0.22362	0	0.783585	0.886234	2.18701	0	0	0	0	0
Ksc	0	0.147185	0.0845223	0	0	0	0	0	0.0663252	0	0	0	0	0	0	0	0	0.0757058	0.381296	0	0.225434	0	0	0	0	0	0	0	1.32575	1.05259	1.57875
Kex	0	0	0	0	0	0	0	0	0.143623	0	0	0.321771	0	0	0	0	0	0.159628	0.250969	0.139132	0.0590264	0.19243	0	0	0	0	0	1.32575	0	1.6962	1.99599
Kis	0	0	0	0	0	0	0	0	0	0	0	-0.102041	0	0	0	0	0	0	0	0	0	0	0	0	0	0	0	1.05259	1.6962	0	1.88456
Kue	0	0	0	0	0	0	0	0	0	0	0	0	0	0	0	0	0	0	0	0	0	0	0	0	0	0	0	1.57875	1.99599	1.88456	0

## Sheet: Physics SINM
	Efu	Elr	Esp	Enk	Els	Iph	Vpr	Vpa	Vpm	Vpu	Vpo	Btv	Bsb	Bwc	Bsr	Bsm	Bsc	Sce	Scg	Scl	Sct	Scu	Sci	Fmc	Fms	Fmd	Fmw	Ksc	Kex	Kis	Kue
Efu	0	1.11936	1.14594	1.01766	1.14301	0	0	0	0.0681433	0	0.0670959	0.137254	0	0.169412	0	0	0	0	0.0796161	0.237271	0.181985	0.0195783	0	0.0501689	0.151552	0	0	0	0	0	0
Elr	1.11936	0	0.409072	1.02366	1.07543	0.0272056	0.0734724	0	0.223487	0.260294	0	0.454145	0.46513	0.0966295	0	0.613758	0	0.13252	0.0959042	0	0.205244	0	0	0.118924	0.0562936	0.415009	0.149578	0.144431	0	0	0
Esp	1.14594	0.409072	0	1.12091	0.388625	0.512302	0.0547953	0.150354	0	0.0301936	0.210332	0.129251	0.0584775	0.0749363	0.170587	0	0	0.0667624	0.494091	0.310551	0.170267	0.265429	0.0416977	0.0292596	0.0236432	0.421527	0.192034	0.0874202	0	0	0
Enk	1.01766	1.02366	1.12091	0	1.79152	0	0	0	0.138736	0.447766	0	0.293055	0	0	0	0	0	0	0.143237	0.0535916	0	0.098144	0.257367	0	0	0	0	0	0	0	0
Els	1.14301	1.07543	0.388625	1.79152	0	0.584914	0	0.223449	0.385685	0.0850964	0.109961	0	0	0.255695	0	0	0	0	0.0401853	0	0	0.26185	0	0.564435	0.814092	0	0	0	0	0	0
Iph	0	0.0272056	0.512302	0	0.584914	0	0	0.0617087	0.0498818	0	0	0.227362	0.127178	0	0	0	0	0.366779	0	0.220184	0	0.0850615	0	0.216522	0.0731009	0.231604	0.112888	0	0	0	0
Vpr	0	0.0734724	0.0547953	0	0	0	0	0.320782	0.618318	0.590461	0	0.238628	0.129348	0.147415	0.126933	0.111459	0	0	0	0	0	0	0	0	0	0	0	0	0	0	0
Vpa	0	0	0.150354	0	0.223449	0.0617087	0.320782	0	1.80778	0.272345	1.42391	0	0	0	0.0835574	0	0	0	0	0	0	0	0	0.691312	0.108736	0	0.239845	0	0	0	0
Vpm	0.0681433	0.223487	0	0.138736	0.385685	0.0498818	0.618318	1.80778	0	1.00377	1.04593	0.235544	0.106669	0	0	0.0808719	0	0.333717	0	0	0	0.317901	0	0.197841	0.381369	0.387221	0	0.0653522	0.144544	0	0
Vpu	0	0.260294	0.0301936	0.447766	0.0850964	0	0.590461	0.272345	1.00377	0	0.514681	0.270932	0	0.0598268	0	0	0	0	0.269782	0.189114	0	0	0.305526	0	0	0	0.259696	0	0	0	0
Vpo	0.0670959	0	0.210332	0	0.109961	0	0	1.42391	1.04593	0.514681	0	0	0	0.0862546	0	0	0	0	0.0355149	0	0.0864099	0	0	0.768342	0.631174	0	0.423099	0	0	0	0
Btv	0.137254	0.454145	0.129251	0.293055	0	0.227362	0.238628	0	0.235544	0.270932	0	0	0.770409	0.472222	0.548953	0.640395	0	0	0	0	0	0	0.053563	0.268629	0	0	0.147924	0	0.275075	0	0
Bsb	0	0.46513	0.0584775	0	0	0.127178	0.129348	0	0.106669	0	0	0.770409	0	1.37206	0.910346	0.875992	1.08904	0.210332	0	0	0	0.0694358	0	0.038502	0.177212	0	0.268921	0	0	0	0
Bwc	0.169412	0.0966295	0.0749363	0	0.255695	0	0.147415	0	0	0.0598268	0.0862546	0.472222	1.37206	0	0.862846	0.572399	0	0	0	0	0	0	0	0	0.0437885	0	0.370322	0	0	0	0
Bsr	0	0	0.170587	0	0	0	0.126933	0.0835574	0	0	0	0.548953	0.910346	0.862846	0	1.28024	0.782557	0	0	0	0	0	0	0	0	0	0	0	0	0	0
Bsm	0	0.613758	0	0	0	0	0.111459	0	0.0808719	0	0	0.640395	0.875992	0.572399	1.28024	0	0.40273	0.0587086	0.16734	0	0	0	0	0.0735185	0	0	0.0963151	0	0	0	0
Bsc	0	0	0	0	0	0	0	0	0	0	0	0	1.08904	0	0.782557	0.40273	0	0	0	0	0	0	0.250867	0	0	0.346532	0	0	0	0	0
Sce	0	0.13252	0.0667624	0	0	0.366779	0	0	0.333717	0	0	0	0.210332	0	0	0.0587086	0	0	0.970167	0.49797	1.45635	0.354959	0.398186	0.260557	0.151532	0.811611	0.126457	0.0777511	0.159397	0	0
Scg	0.0796161	0.0959042	0.494091	0.143237	0.0401853	0	0	0	0	0.269782	0.0355149	0	0	0	0	0.16734	0	0.970167	0	0.60645	0.418756	0.590181	0.431817	0.123763	0	0	0.153637	0.381536	0.250741	0	0
Scl	0.237271	0	0.310551	0.0535916	0	0.220184	0	0	0	0.189114	0	0	0	0	0	0	0	0.49797	0.60645	0	1.90342	0.783571	1.03575	0	0	0.292249	0	0	0.134442	0	0
Sct	0.181985	0.205244	0.170267	0	0	0	0	0	0	0	0.0864099	0	0	0	0	0	0	1.45635	0.418756	1.90342	0	0.902183	1.0551	0	0.141143	0.112651	0.0782813	0.225434	0.0590264	0	0
Scu	0.0195783	0	0.265429	0.098144	0.26185	0.0850615	0	0	0.317901	0	0	0	0.0694358	0	0	0	0	0.354959	0.590181	0.783571	0.902183	0	1.56833	0	0.0729972	0	0.231843	0	0.190711	0	0
Sci	0	0	0.0416977	0.257367	0	0	0	0	0	0.305526	0	0.053563	0	0	0	0	0.250867	0.398186	0.431817	1.03575	1.0551	1.56833	0	0	0	0	0	0	0	0	0
Fmc	0.0501689	0.118924	0.0292596	0	0.564435	0.216522	0	0.691312	0.197841	0	0.768342	0.268629	0.038502	0	0	0.0735185	0	0.260557	0.123763	0	0	0	0	0	2.69805	1.67055	0.780089	0	0	0	0
Fms	0.151552	0.0562936	0.0236432	0	0.814092	0.0731009	0	0.108736	0.381369	0	0.631174	0	0.177212	0.0437885	0	0	0	0.151532	0	0	0.141143	0.0729972	0	2.69805	0	1.97022	0.880916	0	0	0	0
Fmd	0	0.415009	0.421527	0	0	0.231605	0	0	0.387221	0	0	0	0	0	0	0	0.346532	0.811611	0	0.292249	0.112651	0	0	1.67055	1.97022	0	2.18367	0	0	0	0
Fmw	0	0.149578	0.192034	0	0	0.112888	0	0.239845	0	0.259696	0.423099	0.147924	0.268921	0.370322	0	0.0963151	0	0.126457	0.153637	0	0.0782813	0.231843	0	0.780089	0.880916	2.18367	0	0	0	0	0
Ksc	0	0.144431	0.0874202	0	0	0	0	0	0.0653522	0	0	0	0	0	0	0	0	0.0777511	0.381536	0	0.225434	0	0	0	0	0	0	0	1.32575	1.02489	1.57875
Kex	0	0	0	0	0	0	0	0	0.144544	0	0	0.275075	0	0	0	0	0	0.159397	0.250741	0.134442	0.0590264	0.190711	0	0	0	0	0	1.32575	0	1.66573	1.99599
Kis	0	0	0	0	0	0	0	0	0	0	0	0	0	0	0	0	0	0	0	0	0	0	0	0	0	0	0	1.02489	1.66573	0	1.861
Kue	0	0	0	0	0	0	0	0	0	0	0	0	0	0	0	0	0	0	0	0	0	0	0	0	0	0	0	1.57875	1.99599	1.861	0

## Sheet: Biology SINM
	Efu	Elr	Esp	Enk	Els	Ipb	Ihb	Vpr	Vpa	Vpm	Vpu	Vpo	Btv	Bsb	Bwc	Bsr	Bsm	Bsc	Sce	Scg	Scl	Sct	Scu	Sci	Fmc	Fms	Fmd	Fmw	Ksc	Kex	Kis	Kue
Efu	0	1.14053	1.15669	1.02599	1.13513	0.0886129	0	0	0	0.0645317	0	0.0663305	0.150951	0	0.172366	0	0.0431107	0	0	0.078789	0.251557	0.189486	0.0257041	0	0.0532143	0.1512	0	0	0	0	0	0
Elr	1.14053	0	0.408614	1.08932	1.06333	0.109229	0.133492	0.0863923	0	0.203382	0.269633	0	0.480341	0.476669	0.103341	0	0.615892	0	0.154233	0.0910229	0	0.211477	0.0519175	0	0.108138	0.0346665	0.418306	0.176992	0.16601	0	0	0
Esp	1.15669	0.408614	0	1.13242	0.448428	0.067216	0	0.0473567	0.149613	0	0.0382335	0.195989	0.166221	0.0795483	0.0743838	0.178874	0	0	0.127471	0.487043	0.346073	0.171061	0.279779	0.0418684	0.0630378	0.0291304	0.442324	0.21331	0.0865874	0	0	0
Enk	1.02599	1.08932	1.13242	0	1.79251	0	0.110422	0	0	0.14159	0.445057	0	0.305892	0	0	0	0	0	0	0.132847	0.0683939	0	0.101527	0.261929	0	0	0	0	0	0	0	0
Els	1.13513	1.06333	0.448428	1.79251	0	0.50194	0.210402	0	0.225849	0.355586	0.0550427	0.118156	0	0	0.238165	0	0	0	0	0	0	0	0.293601	0	0.572244	0.795774	0	0	0	0	0	0
Ipb	0.0886129	0.109229	0.067216	0	0.50194	0	1.93827	0	0	0.159447	0.290769	0	0	0	0	0	0.186574	0	0	0.183311	0	0	0	0	0	0.207446	0.306186	0	0	0	0	0
Ihb	0	0.133492	0	0.110422	0.210402	1.93827	0	0.0644534	0	0.0557887	0	0	0	0	0	0	0	0	0	0	0	0	0	0	0.269421	0	0	0	0	0	0	0
Vpr	0	0.0863923	0.0473567	0	0	0	0.0644534	0	0.255748	0.614369	0.579171	0	0.24193	0.116752	0.12637	0.103569	0.0909942	0	0	0	0	0	0	0	0	0	0	0	0	0	0	0
Vpa	0	0	0.149613	0	0.225849	0	0	0.255749	0	1.80147	0.241442	1.35369	0	0	0	0	0	0	0	0	0	0	0	0	0.681574	0.114502	0	0.146406	0	0	0	0
Vpm	0.0645317	0.203382	0	0.14159	0.355586	0.159447	0.0557887	0.614369	1.80147	0	0.989975	1.04043	0.243677	0.111786	0	0	0.0694067	0	0.346032	0	0	0	0.325118	0	0.190955	0.361025	0.363314	0	0.0676309	0.1454	0	0
Vpu	0	0.269633	0.0382335	0.445057	0.0550427	0.290769	0	0.579171	0.241443	0.989975	0	0.472227	0.277205	0	0.0405136	0	0	0	0	0.245041	0.209406	0	0	0.312264	0	0	0	0.134514	0	0	0	0
Vpo	0.0663305	0	0.195989	0	0.118156	0	0	0	1.35369	1.04043	0.472227	0	0	0	0	0	0	0	0	0	0	0.0667053	0	0	0.743293	0.606185	0	0.255649	0	0	0	0
Btv	0.150951	0.480341	0.166221	0.305892	0	0	0	0.24193	0	0.243677	0.277205	0	0	0.77474	0.467293	0.545621	0.637401	0	0	0	0	0	0	0.0674095	0.296426	0	0	0.105607	0	0.321771	0	0
Bsb	0	0.476669	0.0795483	0	0	0	0	0.116752	0	0.111786	0	0	0.77474	0	1.34434	0.903128	0.866023	1.03651	0.217129	0	0	0	0.070837	0	0.0439013	0.181905	0	0.260212	0	0	0	0
Bwc	0.172366	0.103341	0.0743838	0	0.238165	0	0	0.12637	0	0	0.0405136	0	0.467293	1.34434	0	0.812218	0.553903	0	0	0	0	0	0	0	0	0.036254	0	0.310949	0	0	0	0
Bsr	0	0	0.178874	0	0	0	0	0.103569	0	0	0	0	0.545621	0.903128	0.812218	0	1.24694	0.741817	0	0	0	0	0	0	0	0	0	0	0	0	0	0
Bsm	0.0431107	0.615892	0	0	0	0.186574	0	0.0909942	0	0.0694067	0	0	0.637401	0.866023	0.553903	1.24694	0	0.32101	0.0623177	0.141795	0.0346906	0	0	0	0.0694388	0	0	0.0625769	0	0	0	0
Bsc	0	0	0	0	0	0	0	0	0	0	0	0	0	1.03651	0	0.741817	0.32101	0	0	0	0	0	0	0.241061	0	0	0.33962	0	0	0	0	0
Sce	0	0.154233	0.127471	0	0	0	0	0	0	0.346032	0	0	0	0.217129	0	0	0.0623177	0	0	0.9567	0.527032	1.4539	0.364917	0.388428	0.294981	0.167634	0.819248	0.133121	0.0743753	0.157937	0	0
Scg	0.078789	0.0910229	0.487043	0.132847	0	0.183311	0	0	0	0	0.245041	0	0	0	0	0	0.141795	0	0.9567	0	0.613273	0.418586	0.592589	0.436636	0.0980151	0	0	0	0.374334	0.252916	0	0
Scl	0.251557	0	0.346073	0.0683939	0	0	0	0	0	0	0.209406	0	0	0	0	0	0.0346906	0	0.527032	0.613273	0	1.91768	0.797307	1.0455	0	0	0.343419	0	0	0.139281	0	0
Sct	0.189486	0.211477	0.171061	0	0	0	0	0	0	0	0	0.0667053	0	0	0	0	0	0	1.4539	0.418586	1.91768	0	0.902937	1.0551	0	0.144339	0.106957	0.0639487	0.225434	0.0590264	0	0
Scu	0.0257041	0.0519175	0.279779	0.101527	0.293601	0	0	0	0	0.325118	0	0	0	0.070837	0	0	0	0	0.364917	0.592589	0.797307	0.902937	0	1.56819	0	0.0868071	0	0.195802	0	0.192292	0	0
Sci	0	0	0.0418684	0.261929	0	0	0	0	0	0	0.312264	0	0.0674095	0	0	0	0	0.241061	0.388428	0.436636	1.0455	1.0551	1.56819	0	0	0	0	0	0	0	0	0
Fmc	0.0532143	0.108138	0.0630378	0	0.572244	0	0.269421	0	0.681574	0.190955	0	0.743293	0.296426	0.0439013	0	0	0.0694388	0	0.294981	0.0980151	0	0	0	0	0	2.69277	1.66258	0.773828	0	0	0	0
Fms	0.1512	0.0346665	0.0291304	0	0.795774	0.207446	0	0	0.114502	0.361025	0	0.606185	0	0.181905	0.036254	0	0	0	0.167634	0	0	0.144339	0.0868071	0	2.69277	0	1.96746	0.878809	0	0	0	0
Fmd	0	0.418306	0.442324	0	0	0.306187	0	0	0	0.363314	0	0	0	0	0	0	0	0.33962	0.819248	0	0.343419	0.106957	0	0	1.66258	1.96746	0	2.14099	0	0	0	0
Fmw	0	0.176992	0.21331	0	0	0	0	0	0.146405	0	0.134514	0.255649	0.105607	0.260212	0.310949	0	0.0625769	0	0.133121	0	0	0.0639487	0.195802	0	0.773828	0.878809	2.14099	0	0	0	0	0
Ksc	0	0.16601	0.0865874	0	0	0	0	0	0	0.0676309	0	0	0	0	0	0	0	0	0.0743753	0.374334	0	0.225434	0	0	0	0	0	0	0	1.32575	1.02489	1.57875
Kex	0	0	0	0	0	0	0	0	0	0.1454	0	0	0.321771	0	0	0	0	0	0.157937	0.252916	0.139281	0.0590264	0.192292	0	0	0	0	0	1.32575	0	1.66573	1.99599
Kis	0	0	0	0	0	0	0	0	0	0	0	0	0	0	0	0	0	0	0	0	0	0	0	0	0	0	0	0	1.02489	1.66573	0	1.861
Kue	0	0	0	0	0	0	0	0	0	0	0	0	0	0	0	0	0	0	0	0	0	0	0	0	0	0	0	0	1.57875	1.99599	1.861	0
